# Supplementary material for: High-spin and low-spin iron(ii) complexes with facially-coordinated borohydride ligands
Source: Royal Society of Chemistry journal article supplement (doi:10.1039/b509580h), 2005-11-17
Supplement: b509580h.pdf [file b509580h.pdf]

*“High-spin and low-spin iron(II) complexes with facially coordinated borohydride ligands” Mehn, M.P.; Brown, S.D.; Paine, T.K.; Brennessel, W. W.; Cramer, C.J.; Peters, J.C.; Que, L., Jr. Supporting Information*

**Table S1** Bond Lengths and Angles

|                | 1          | 2         | LFe(H <sub>3</sub> BH <sub>3</sub> )FeL <sup>a</sup> | L <sub>3</sub> Fe(H <sub>3</sub> BH <sub>3</sub> )FeL <sub>3</sub> <sup>b</sup> | LNiH <sub>3</sub> BH <sup>c</sup> |
|----------------|------------|-----------|------------------------------------------------------|---------------------------------------------------------------------------------|-----------------------------------|
| Fe-B2          | 2.084(4)   | 1.855(2)  | 1.9122(11)                                           | 1.903(3), 1.913(3)                                                              | 2.048(5)                          |
| Fe-H3(H47)     | 1.99(2)    | 1.57(2)   | 1.58(8)                                              | 1.54(2), 1.523(19)                                                              | 1.89(3)                           |
| (Fe-H48)       |            | 1.62(2)   | 1.39(8)                                              | 1.547(18), 1.530(19)                                                            | 1.89(3)                           |
| (Fe-H49)       |            | 1.61(2)   | 1.32(10)                                             | 1.500(19), 1.54(2)                                                              | 1.94(4)                           |
| B2-H3 (H47)    | 1.16(2)    | 1.20(2)   | 1.46(8)                                              | 1.482(19), 1.492(19)                                                            | 1.12(3)                           |
| (B2-H48)       |            | 1.18(2)   | 1.43(8)                                              | 1.558(19), 1.59(2)                                                              | 1.19(3)                           |
| (B2-H49)       |            | 1.26(2)   | 1.32(10)                                             | 1.53(2), 1.501(19)                                                              | 1.19(5)                           |
| B2-H2(H46)     | 0.98(5)    | 1.07(2)   |                                                      |                                                                                 | 0.85(6)                           |
| Fe-N11 (P1)    | 2.106(1)   | 2.2119(4) | 2.187(2)                                             | 2.2367(8), 2.2328(7)                                                            | 1.995(3)                          |
| (Fe-P2)        |            | 2.2088(4) | 2.185(2)                                             | 2.2192(6), 2.2462(7)                                                            | 1.998(3)                          |
| (Fe-P3)        |            | 2.1977(4) | 2.181(2)                                             | 2.2264(6), 2.2374(8)                                                            | 2.009(3)                          |
| B2-Fe-N11 (P1) | 126.10(4)  | 124.24(5) | 126.51(7)                                            | 124.44(9), 116.53(8)                                                            | 123.54(16)                        |
| (B2-Fe-P2)     |            | 126.54(5) | 122.89(7)                                            | 114.37(8), 113.32(8)                                                            | 123.19(17)                        |
| (B2-Fe-P3)     |            | 124.50(5) | 123.67(7)                                            | 116.41(8), 118.12(8)                                                            | 127.37(16)                        |
| N11-Fe-N11     | 88.81(5)   |           |                                                      |                                                                                 |                                   |
| P1-Fe-P2       |            | 92.06(2)  | 89.96(8)                                             | 97.90(3), 105.45(3)                                                             | 90.92(11)                         |
| P2-Fe-P3       |            | 89.03(2)  | 92.98(8)                                             | 100.77(3), 98.99(3)                                                             | 90.64(11)                         |
| P3-Fe-P1       |            | 89.53(2)  | 90.90(8)                                             | 98.92(3), 102.18(3)                                                             | 90.75(11)                         |
| B2-Fe-H3 (H47) | 33.1(7)    | 39.9(7)   | 48(3)                                                | 49.7(7), 49.9(7)                                                                | 32.9(10)                          |
| (B2-Fe-H48)    |            | 39.0(5)   | 48(3)                                                | 52.5(7), 53.6(8)                                                                | 34.9(10)                          |
| (B2-Fe-H49)    |            | 41.9(6)   | 44(4)                                                | 52.0(8), 50.1(7)                                                                | 34.5(13)                          |
| Fe-B2-H3(H47)  | 69(1)      | 57.2(8)   | 54(3)                                                | 52.2(8), 51.4(8)                                                                | 65.9(17)                          |
| (Fe-B2-H48)    |            | 59.5(7)   | 46(3)                                                | 51.9(7), 50.8(7)                                                                | 65.4(16)                          |
| (Fe-B2-H49)    |            | 58.7(7)   | 44(5)                                                | 50.4(8), 52.0(8)                                                                | 68(2)                             |
| Fe-B2-H2 (H46) | 180.000(3) | 178.6(9)  | 180.00(10)                                           | 176.63(16)                                                                      | 167(4)                            |
| H3-B2-H2       | 111(1)     |           |                                                      |                                                                                 |                                   |
| (H46-B2-H47)   |            | 124(1)    |                                                      |                                                                                 | 106(3)                            |
| (H46-B2-H48)   |            | 121(1)    |                                                      |                                                                                 | 102(3)                            |
| (H46-B2-H49)   |            | 120(1)    |                                                      |                                                                                 | 124(5)                            |

<sup>a</sup>Ref 9a <sup>b</sup>Ref 9b <sup>c</sup>Ref 7 All previously published numbers are directly from cif files. Numbering changes for each complex.
